# Supplementary material for: Label-free fluorescent aptasensor for chloramphenicol based on hybridization chain reaction amplification and G-quadruplex/N-methyl mesoporphyrin IX complexation
Source: Royal Society of Chemistry journal article supplement (doi:10.1039/d2ra00572g), 2022-01-01
Supplement: d2ra00572g1.pdf [file d2ra00572g1.pdf]

## Label-free fluorescence aptasensor for chloramphenicol based on hybridization chain reaction amplification and G-quadruplex/*N*-methyl mesoporphyrin IX complexation

Wentao Zheng <sup>a,#</sup>, Yubin Li <sup>b,#</sup>, Liting Zhao <sup>b</sup>, Ciling Li <sup>b</sup>, Lei Wang <sup>a,\*□</sup>

<sup>a</sup>Zhanjiang Central Hospital, Guangdong medical university, Zhanjiang, 524045, China.

<sup>b</sup> Faculty of Chemistry & Environmental Science, Guangdong Ocean University, Zhanjiang, 524088, China.

**Table S1.** Sequences of oligonucleotides

| Name             | Sequence (5'→3')                                                                                   |
|------------------|----------------------------------------------------------------------------------------------------|
| Apt              | 5'- <u>ACT TCA GTG AGT TGT CCC ACG</u> GTC GGC GAG TCG GTG GTA G - 3'                              |
| Apt-C            | 5'- <u>GT GGG ACA ACT CAC TGA AGT</u> -3'                                                          |
| Initiator-MB     | 5'- <u>ACC TTC TTC TACT TCA GTG AGT TGT CCC ACA GAA</u><br><u>GAA GGT GTT TAA GTA</u> -3'          |
| Hairpin DNA (H1) | 5'- AGG GCG GGT <u>GGG TGT TTA AGT TGG AGA ATT GTA</u><br><u>CTT AAA CAC CTT CTT CTT GGG T</u> -3' |
| Hairpin DNA (H2) | 5'- TGG GTC AAT TCT <u>CCA ACT TAA ACT</u> AGA AGA AGG<br><u>TGT TTA AGT TGG</u> GTA GGG CGG G -3' |

Spectra properties of samples were detected under the same experimental conditions using an F-4600 Hitachi fluorescence Spectrometer with a xenon lamp. At an excitation of  $\lambda = 399\text{nm}$ , the emission peak was recorded at 612 nm both for *N*-Methyl mesoporphyrin IX(NMM) and NMM/G4 (Figure S1). However, the fluorescence intensity of NMM/G4 was significantly higher than that of NMM, indicating that the NMM/G4 composite greatly enhanced the fluorescence of NMM.

\* Corresponding author. E-mail addresses: wangleigdmu@163.com (Lei Wang)

# Wentao Zheng and Yubin Li contributed equally to this work.

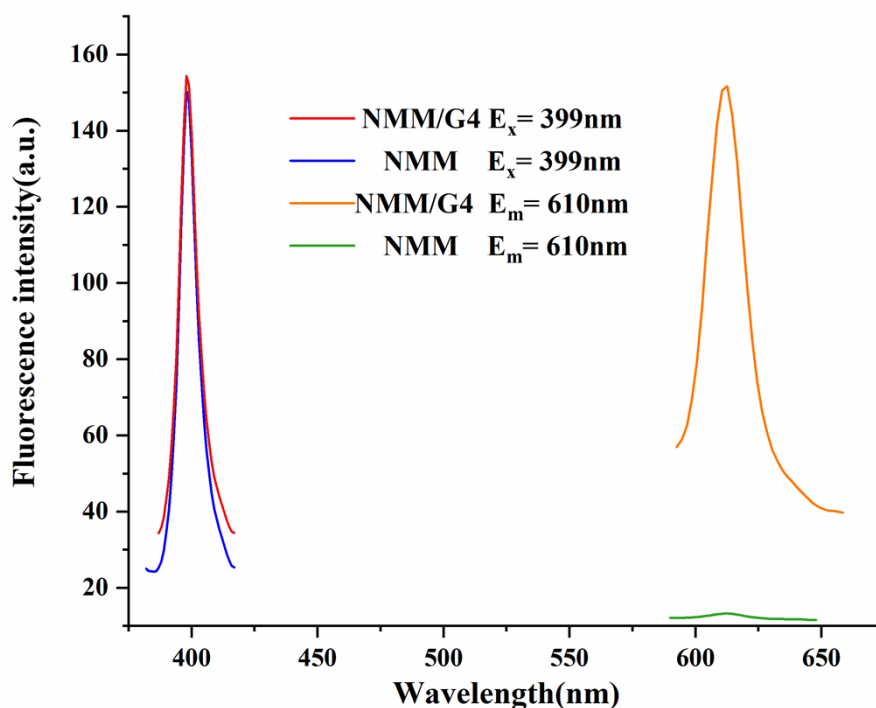

**Figure S1.** Spectra properties of NMM and NMM/G4

The fluorescence intensity of NMM was enhanced after the complexation reaction with G-quadruplexes. The systematic quantum yield was measured for G4/ NMM, and the quinine sulfate dihydrate which dissolved in 0.1 mol/L H<sub>2</sub>SO<sub>4</sub> with a quantum yield of 51% was the reference. The quantum yield ( $y$ ) is calculated by the following formula.

$$Y = Y_R \cdot \frac{F_S \cdot A_R \cdot \eta_S^2}{F_R \cdot A_S \cdot \eta_R^2}$$

$F$  is the integral area of the fluorescence emission spectrum,  $A$  is the absorbance, and  $\eta$  is the refractive index of the solvent ( $R$  and  $S$  represent the reference quinine sulfate dihydrate solution and the sample respectively)

The systematic quantum yield measurements were shown in table S2.

**Table S2.** Systematic quantum yield measurements

|           | Test sample               | $\lambda_{ex}/nm$ | $A$   | $F$   | $Y$  |
|-----------|---------------------------|-------------------|-------|-------|------|
| Reference | quinine sulfate dihydrate | 399               | 0.024 | 13245 | 0.51 |
| Sample    | G/NMM                     | 399               | 0.02  | 15319 | 0.64 |

**Table S3.** Comparison with other methods for CAP detection

| Method                                                  | Detection limit           | Detection range                                 | Ref.               |
|---------------------------------------------------------|---------------------------|-------------------------------------------------|--------------------|
| Electrochemiluminescence assay                          | 1.7 pg·mL <sup>-1</sup>   | 0.01 - 4000 ng·mL <sup>-1</sup>                 | (Chen et al. 2020) |
| Structure switching signaling Assay                     | 0.70 ng mL <sup>-1</sup>  | 1 - 100 ng·mL <sup>-1</sup>                     | (Ma et al. 2020)   |
| MOF-based ratiometric fluorescent biosensor             | 0.08 pg mL <sup>-1</sup>  | 0.1pg ·mL <sup>-1</sup> - 10ng·mL <sup>-1</sup> | (Liu et al. 2020)  |
| Electrochemical sensor                                  | 0.32 μmol·L <sup>-1</sup> | 0.03 - 0.5 mmol·L <sup>-1</sup>                 | (Shad et al. 2019) |
| Photovoltammetric sensor                                | 0.14 μmol·L <sup>-1</sup> | 0.5 - 50 μmol·L <sup>-1</sup>                   | (Zhu et al. 2019)  |
| Chemiluminescence resonance energy transfer assay       | 2.0 pg·mL <sup>-1</sup>   | 0.01 - 100 ng·mL <sup>-1</sup>                  | (Jia et al. 2019)  |
| Label free aptasensor based on HCR and G-quadruplex/NMM | 0.8 pg·mL <sup>-1</sup>   | 2.5 - 200 pg·mL <sup>-1</sup>                   | This work          |

Chen, J., Zheng, J., Zhao, K., Deng, A., & Li, J. (2020). Electrochemiluminescence resonance energy transfer system between non-toxic SnS<sub>2</sub> quantum dots and ultrathin Ag@Au nanosheets for chloramphenicol detection. *Chemical Engineering Journal*, 123670.

Ma, X. Y., Li, H. X., Qiao, S. N., Huang, C. J., Liu, Q. I., & Shen, Xu. (2020). A simple and rapid sensing strategy based on structure-switching signaling aptamers for the sensitive detection of chloramphenicol. *Food Chemistry*, 302, 125359.

Liu, S., Bai, J. L., Huo, Y. P., Ning, B. A., Peng, Y., Li, S., Gao, Z. X. (2020). A zirconium-porphyrin mof-based ratiometric fluorescent biosensor for rapid and ultrasensitive detection of chloramphenicol. *Biosensors and Bioelectronics*, 149, 111801.

Shad, N. A., Bajwa, S. Z., Amin, N., Taj, A., Hameed, S., Khan, Y., Dai, Z., Khan, W.S. (2019). Solution growth of 1D zinc tungstate (ZnWO<sub>4</sub>) nanowires; design, morphology, and electrochemical sensor fabrication for selective detection of chloramphenicol. *Journal of Hazardous Materials*, 367, 205-214.

Zhu, Y. H., Yan, K., Xu, Z. W., Wu, J. N., & Zhang, J. D. (2019). Cathodic “signal-on” photoelectrochemical aptasensor for chloramphenicol detection using hierarchical porous flower-like Bi-BiOI@C composite. *Biosensors and Bioelectronics*, 131, 79–87.

Jia, B. J., He, X., Cui, P. L., Liu, J. X., & Wang, J. P. (2019). Detection of chloramphenicol in meat with a chemiluminescence resonance energy transfer platform based on molecularly imprinted graphene. *Analytica Chimica Acta*, 1063, 136-143.
